# Supplementary material for: Antioxidant, Wound Healing Potential and In Silico Assessment of Naringin, Eicosane and Octacosane
Source: MDPI journal article supplement (doi:10.3390/molecules28031043), 2023-01-20
Supplement: s1 [file s1]

## SUPPLEMENTARY DATA

# Antioxidant, Wound Healing Potential and In Silico Assessment of Naringin, Eicosane and Octacosane

Abbirami Balachandran <sup>1</sup>, Sy Bing Choi <sup>1</sup>, Morak-Młodawska Beata <sup>2</sup>, Jeleń Małgorzata <sup>2,\*</sup>, Gabriele R. A. Froemming <sup>3</sup>, Charlie A. Lavilla, Jr. <sup>4</sup>, Merell P. Billacura <sup>5</sup>, Stephanie N. Siyumbwa <sup>6</sup> and Patrick N. Okechukwu <sup>1,\*</sup>

<sup>1</sup> Department of Biotechnology, Faculty of Applied Sciences, UCSI University, Cheras, 56000 Kuala Lumpur, Malaysia

<sup>2</sup> Faculty of Pharmaceutical Sciences, Department of Organic Chemistry, Medical University of Silesia, Jagiellonska, Str. 4, 41-200 Sosnowiec, Poland

<sup>3</sup> Basic Medical Sciences, Faculty of Medicine and Health Sciences, Universiti Malaysia Sarawak (UNIMAS), Kota Samarahan 94300, Sarawak, Malaysia

<sup>4</sup> Chemistry Department, College of Science & Mathematics, Mindanao State University–Iligan Institute of Technology, Iligan City, 9200, Lanao del Norte, Philippines

<sup>5</sup> Department of Chemistry, College of Natural Sciences and Mathematics, Mindanao State University–Main Campus, Marawi City, 9700, Lanao del Sur, Philippines

<sup>6</sup> Department of Pathology and Microbiology, School of Medicine, P.O. Box 50110, Lusaka, Zambia

\* Correspondence: manowak@sum.edu.pl (J.M.); patrickn@ucsiuniversity.edu.my (P.N.O.); Tel.: +48-32-364-16-04(J.M.); +603-9101-8880 (P.N.O.)

**Table S1** HPTLC calibration parameters

| Parameters              | Results (Mean ± SD) (n = 3) |
|-------------------------|-----------------------------|
| Regression equation     | y = 2.037x + 725.8          |
| Correlation coefficient | 0.973 ± 0.024               |
| Linearity range         | 200 – 1000 µg/mL            |
| Limit of detection      | 0.75 ± 0.29 µg              |
| Limit of quantification | 7.73 ± 0.26 µg              |
| Amount of Naringin      | 642.39 ± 22.9 mg/g (64%)    |

**Table S2** Intra- and inter-day precision of Naringin (n = 3)

| Amount (µg/mL) | Intraday precision |      | Interday precision |      |
|----------------|--------------------|------|--------------------|------|
|                | SD in height       | %CV  | SD in height       | %CV  |
| 200            | 13.23              | 0.81 | 23.48              | 1.85 |
| 600            | 42.58              | 1.11 | 26.56              | 1.08 |
| 1000           | 61.29              | 1.03 | 64.29              | 1.56 |

**Table S3** Recovery studies of Naringin by the proposed TLC densitometric method

| Concentration (µg/mL) |               | Sample height |               | Total height (sample + standard) | % Recovery |
|-----------------------|---------------|---------------|---------------|----------------------------------|------------|
| Sample                | Spiked amount | Sample height | Spiked height |                                  |            |

|         |      |        |         |        |       |
|---------|------|--------|---------|--------|-------|
| 600     | 200  | 2855.5 | 1730.7  | 4445.4 | 91.88 |
| 600     | 600  | 3162.7 | 3945.2  | 6618.6 | 95.40 |
| 600     | 1000 | 4979.3 | 86726.7 | 8833.1 | 90.40 |
| Average |      |        |         |        | 92.56 |

**Table S4** Compounds identified in the SNP A of *M. pumilum* extract with GC-MS

| No. | RT     | Compounds                                               | CAS registry           | Molecular Compound                                            | MW             | PA%         |
|-----|--------|---------------------------------------------------------|------------------------|---------------------------------------------------------------|----------------|-------------|
| 1   | 3.762  | 1-Butene, 2,3,3-trimethyl-                              | 594-56-9 (NIST)        | C <sub>7</sub> H <sub>14</sub>                                | 98.186         | 2.16        |
|     |        | 2-Pentene, 4,4-dimethyl-, (Z)-                          | 762-63-0 (NIST)        | C <sub>7</sub> H <sub>14</sub>                                | 98.186         |             |
|     |        | 2-Pentene, 4,4-dimethyl-, (E)-                          | 690-08-4 (NIST)        | C <sub>7</sub> H <sub>14</sub>                                | 98.186         |             |
| 2   | 14.302 | 2-Pentadecanone, 6,10,14-trimethyl                      | 502-69-2 (NIST)        | C <sub>18</sub> H <sub>36</sub> O                             | 268.478        | 4.46        |
| 3   | 15.097 | 1-Octacosanol                                           | 29739970 (CS)          | C <sub>30</sub> H <sub>57</sub> F <sub>3</sub> O <sub>2</sub> | 506.768        | 2.61        |
|     |        | Docos-1-ene                                             | 1599-67-3 (NIST)       | C <sub>22</sub> H <sub>44</sub>                               | 308.585        |             |
|     |        | 9-Nonadecene                                            | 31035-07-1 (NIST)      | C <sub>19</sub> H <sub>38</sub>                               | 266.505        |             |
| 4   | 15.372 | Isophytol                                               | 505-32-8 (NIST)        | C <sub>20</sub> H <sub>40</sub> O                             | 296.351        | 2.96        |
| 5   | 16.877 | Tetracosyl heptafluorobutyrate                          | 29739954 (CS)          | C <sub>28</sub> H <sub>49</sub> F <sub>7</sub> O <sub>2</sub> | 550.676        | 2.38        |
| 6   | 17.661 | Ethanol, 2-(octadecyloxy)-                              | 2136-72-3 (NIST)       | C <sub>20</sub> H <sub>42</sub> O <sub>2</sub>                | 314.546        | 2.03        |
|     |        | 1-(4-Bromobutyl)-2-piperidinone                         | 467195 (CS)            | C <sub>9</sub> H <sub>16</sub> BrNO                           | 234.133        |             |
|     |        | 1-Decanol, 2-hexyl-                                     | 2425-77-6 (NIST)       | C <sub>16</sub> H <sub>34</sub> O                             | 242.441        |             |
| 7   | 18.530 | Tricosane                                               | 638-67-5 (NIST)        | C <sub>23</sub> H <sub>48</sub>                               | 324.627        | 2.56        |
| 9   | 20.659 | Bis(2-ethylhexyl) phthalate                             | 117-81-7 (NIST)        | C <sub>24</sub> H <sub>38</sub> O <sub>4</sub>                | 390.556        | 17.80       |
|     |        | Bis(2-propylpentyl) phthalate                           | 166657 (CS)            | C <sub>24</sub> H <sub>38</sub> O <sub>4</sub>                | 390.556        |             |
| 10  | 22.513 | i-Propyl 9-octadecenoate                                | 111-59-1 (PC)          | C <sub>21</sub> H <sub>40</sub> O <sub>2</sub>                | 324.541        | 2.46        |
|     |        | Octadec-9-enoic acid                                    | 2027-47-6 (NIST)       | C <sub>18</sub> H <sub>34</sub> O <sub>2</sub>                | 282.461        |             |
| 11  | 23.142 | Pentadecane                                             | 629-62-9 (NIST)        | C <sub>15</sub> H <sub>32</sub>                               | 212.415        | 7.89        |
|     |        | Heptadecane, 9-octyl-                                   | 7225-64-1 (NIST)       | C <sub>25</sub> H <sub>52</sub>                               | 352.680        |             |
|     |        | Heptacosane, 1-chloro-                                  | 62016-79-9 (NIST)      | C <sub>27</sub> H <sub>55</sub> Cl                            | 415.179        |             |
| 12  | 24.756 | Heneicosane                                             | 629-94-7 (NIST)        | C <sub>21</sub> H <sub>44</sub>                               | 296.574        | 11.72       |
|     |        | Hexadecane, 1-iodo-                                     | 544-77-4 (NIST)        | C <sub>16</sub> H <sub>33</sub> I                             | 352.338        |             |
|     |        | <b>Octacosane</b>                                       | <b>630-02-4 (NIST)</b> | <b>C<sub>28</sub>H<sub>58</sub></b>                           | <b>394.760</b> |             |
| 13  | 26.902 | <b>Eicosane</b>                                         | <b>112-95-8 (NIST)</b> | <b>C<sub>20</sub>H<sub>42</sub></b>                           | <b>282.548</b> | <b>5.25</b> |
| 14  | 27.932 | 1,3-Dithiolane, 2-(28-norurs-12-en -17-yl)-             | 473220 (CS)            | C <sub>32</sub> H <sub>52</sub> S <sub>2</sub>                | 500.885        | 2.65        |
|     |        | 3,7,11-Trimethyl-dodeca-2,4,6,10-tetraenal              | 23255776 (CS)          | C <sub>15</sub> H <sub>22</sub> O                             | 218.335        |             |
|     |        | (22E)-3',7β-Dihydrocycloprop[7,8]-5α-ergost-22-en-3-one | 53755-18-3 (CB)        | NR                                                            | NR             |             |
| 15  | 28.361 | β-Amyrin                                                | 559-70-6 (NIST)        | C <sub>30</sub> H <sub>50</sub> O                             | 426.717        | 6.84        |
|     |        | Urs-12-en-3-one                                         | 532729 (CS)            | C <sub>30</sub> H <sub>48</sub> O                             | 424.702        |             |

**Table S5** List of MMPs involved in the wound healing process

| Protein Name | PDB ID | Resolution |
|--------------|--------|------------|
|--------------|--------|------------|

|                            |      |        |
|----------------------------|------|--------|
| Collagenase 1 (MMP-1)      | 966C | 1.90 Å |
| Collagenase 2 (MMP-8)      | 4QKZ | 1.20 Å |
| Collagenase 3 (MMP-13)     | 2D1N | 2.37 Å |
| Stromelysin 1 (MMP-3)      | 2D1O | 2.02 Å |
| Stromelysin 2 (MMP-10)     | 1SLN | 2.27 Å |
| Stromelysin 3 (MMP-11)     | 1HV5 | 2.60 Å |
| Matrilysin (MMP-7)         | 7WXX | 1.50 Å |
| Metalloelastase (MMP-12)   | 2HU6 | 1.32 Å |
| Metalloproteinase (MMP-14) | 5H0U | 2.24 Å |
| Gelatinase A (MMP-2)       | 7XGJ | 2.80 Å |
| Gelatinase B (MMP-9)       | 6EEM | 2.61 Å |

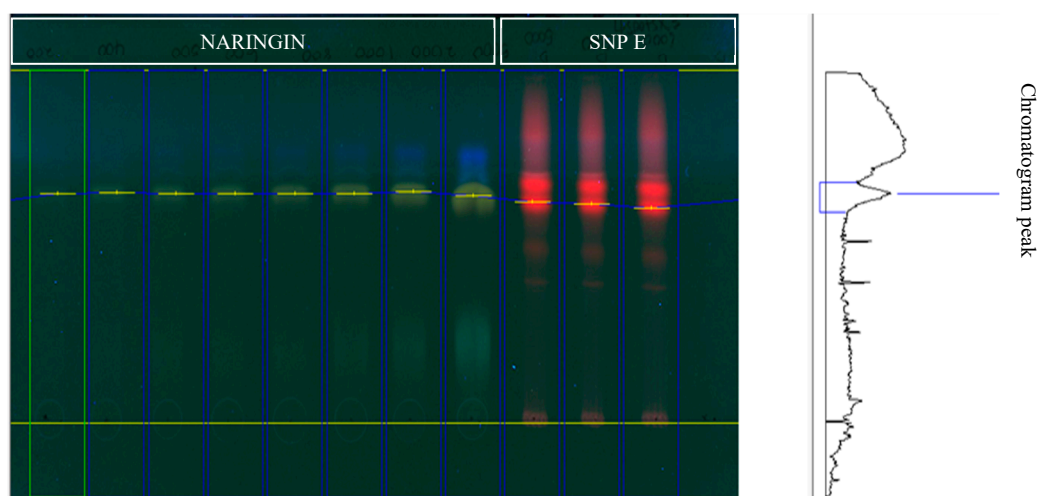

(a)

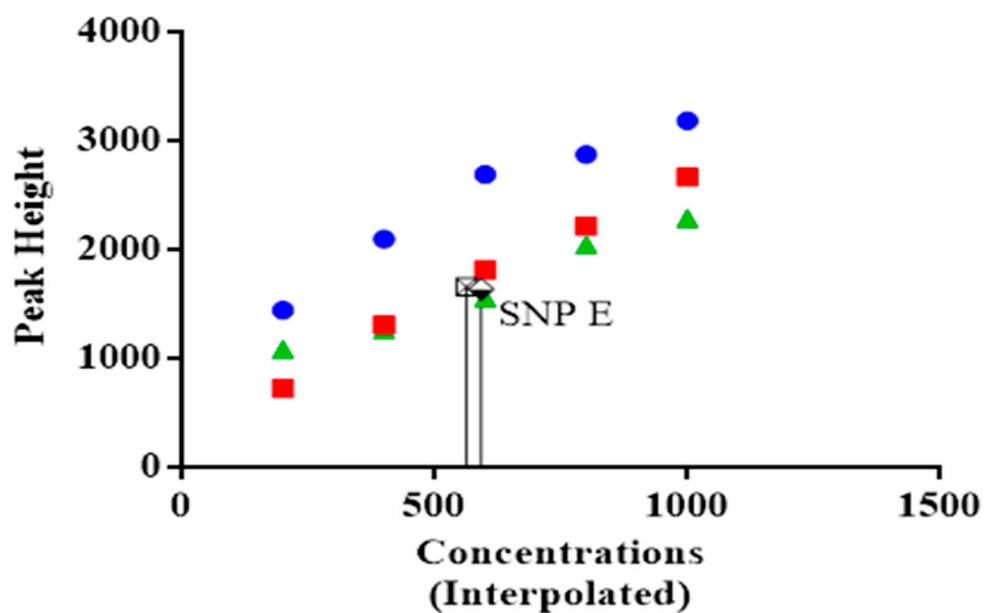

(b)

**Figure S1.** The HPTLC analysis of Naringin from SNP E of the plant extract. **(a)** Video scan capture of TLC plate at 366 nm of Naringin and SNP E and **(b)** Interpolation of the amount of Naringin in SNP E from the standard curve.

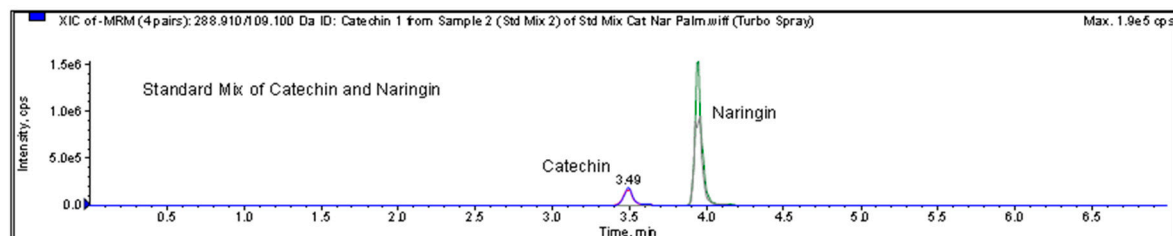

(a)

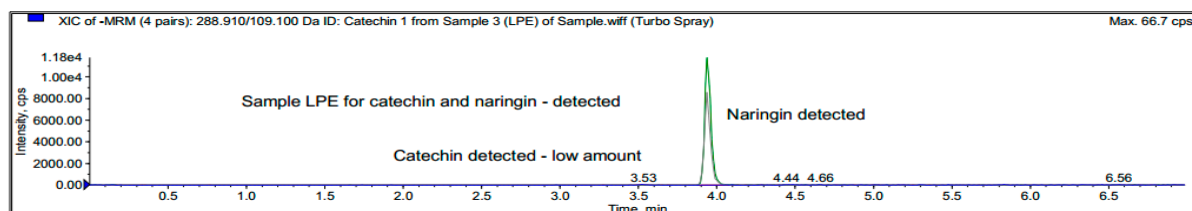

(b)

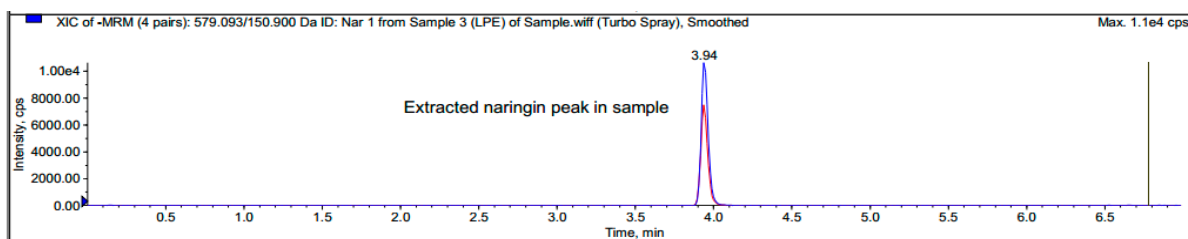

(c)

**Figure S2.** Targeted LC-MS/MRM analysis of SNP E against naringin and catechin. (a) Standard naringin and catechin peaks without the extract (b) Naringin and catechin peaks from SNP E and (c) Matching peaks of standard naringin and naringin from SNP E.

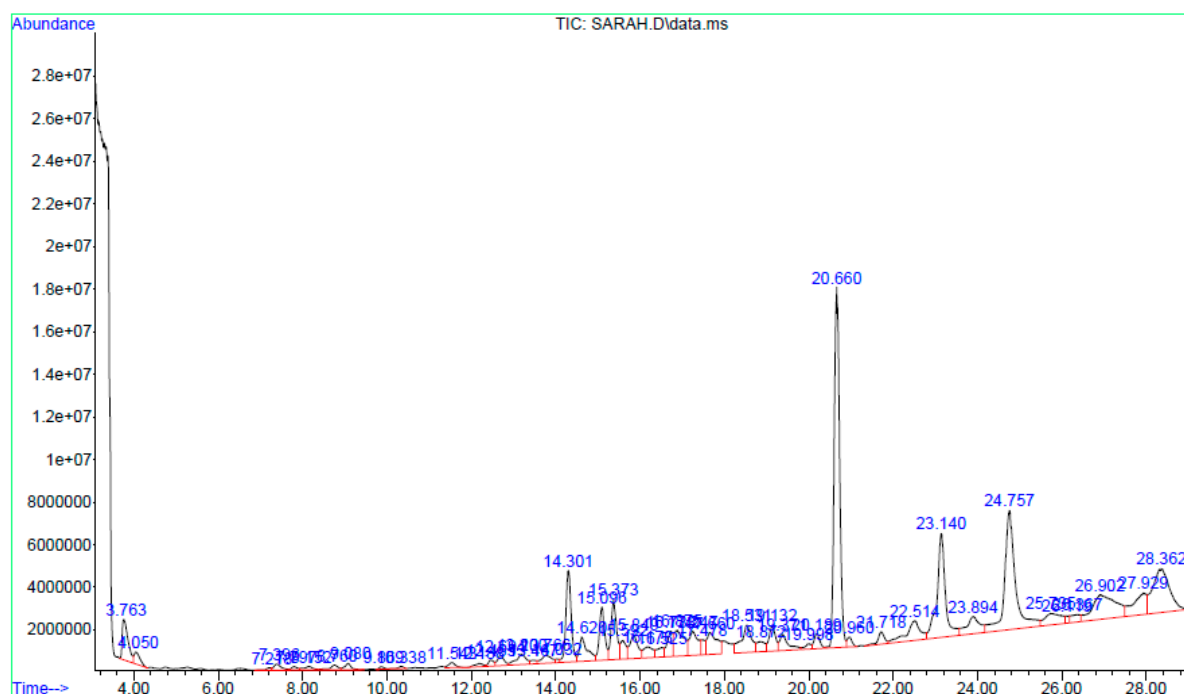

**Figure S3.** GC-MS analysis of SNP A from partially purified *M. pumilum* dichloromethane extract.
